# Supplementary material for: Template-free amine-bridged silsesquioxane with dangling amino groups and its CO2adsorption performance
Source: Royal Society of Chemistry journal article supplement (doi:10.1039/c8ta05106b), 2018-01-01
Supplement: c8ta05106b1.pdf [file c8ta05106b1.pdf]

Supporting Information

## Template-free Amine-Bridged Silsesquioxane with dangling amino groups and its CO<sub>2</sub> adsorption performance

Dang Viet Quang, Abdallah Dindi, Khalid A. Al-Ali, Mohammad R.M. Abu-Zahra\*

**Table S1.** List of aminosilanes used for research and their structure

| No | Aminosilane precursors                               | Structure                                                                           |
|----|------------------------------------------------------|-------------------------------------------------------------------------------------|
| 1  | Bis[3-(trimethoxysilyl)propyl]amine (BTMSPA)         | 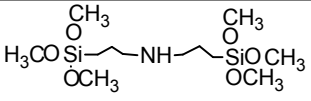  |
| 2  | 3-Aminopropyltriethoxysilane (APTES)                 |   |
| 3  | [3-(2-Aminoethylamino)propyl]trimethoxysilane (DAMS) |   |
| 4  | N-(3-trimethoxysilylpropyl)diethylenetriamine (TAMS) |  |

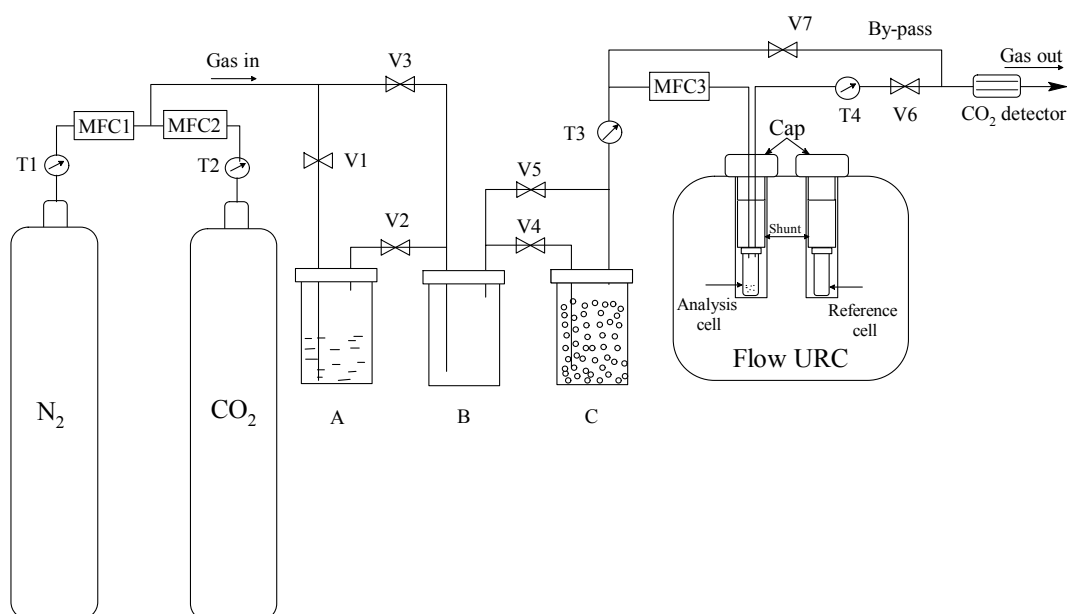

**Figure S1.** A schematic illustration of the CO<sub>2</sub> adsorption experiment

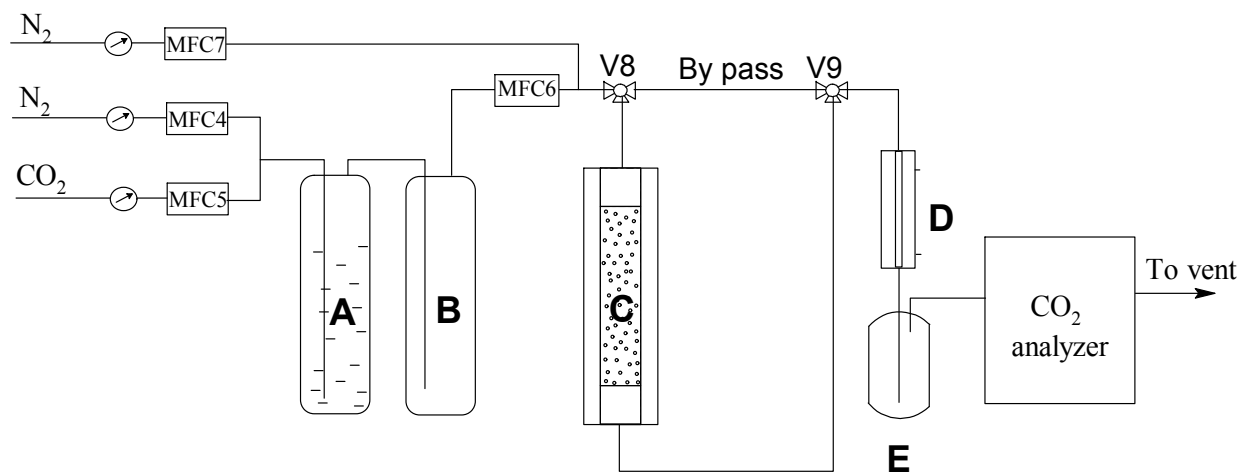

Figure S2. Experimental Setup of the packed bed reactor for investigating the adsorbent recyclability

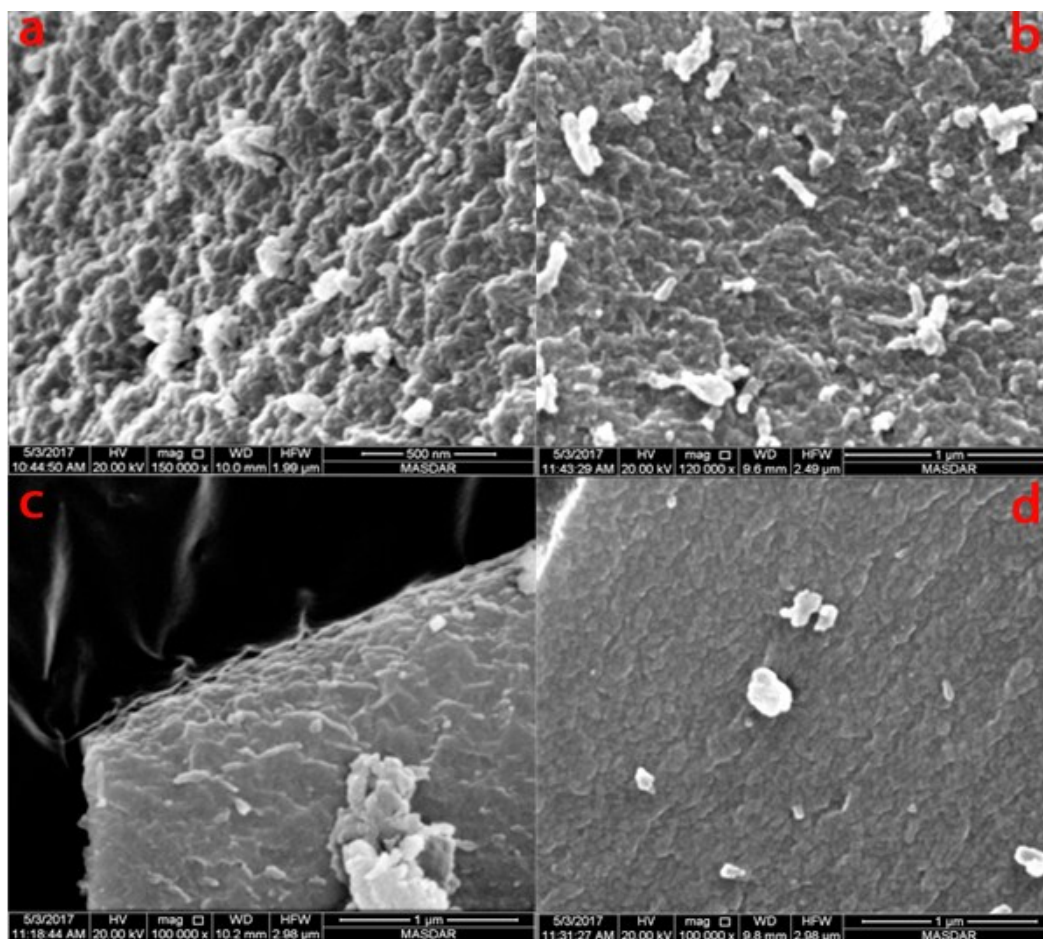

Figure S3. SEM images of ABS (a), APTES-ABS (b), DAMS-ABS (c), and TAMS-ABS (d)

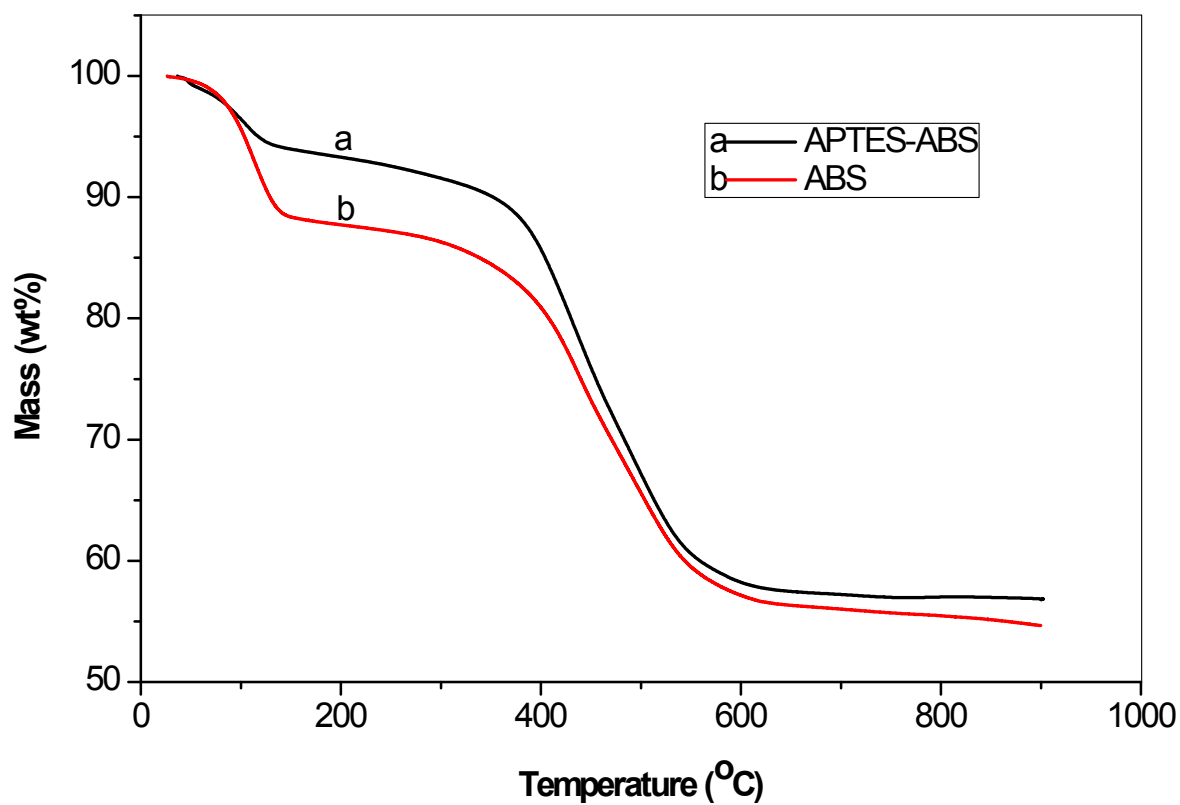

Figure S4. TGA profile of ABS and APTES-ABS

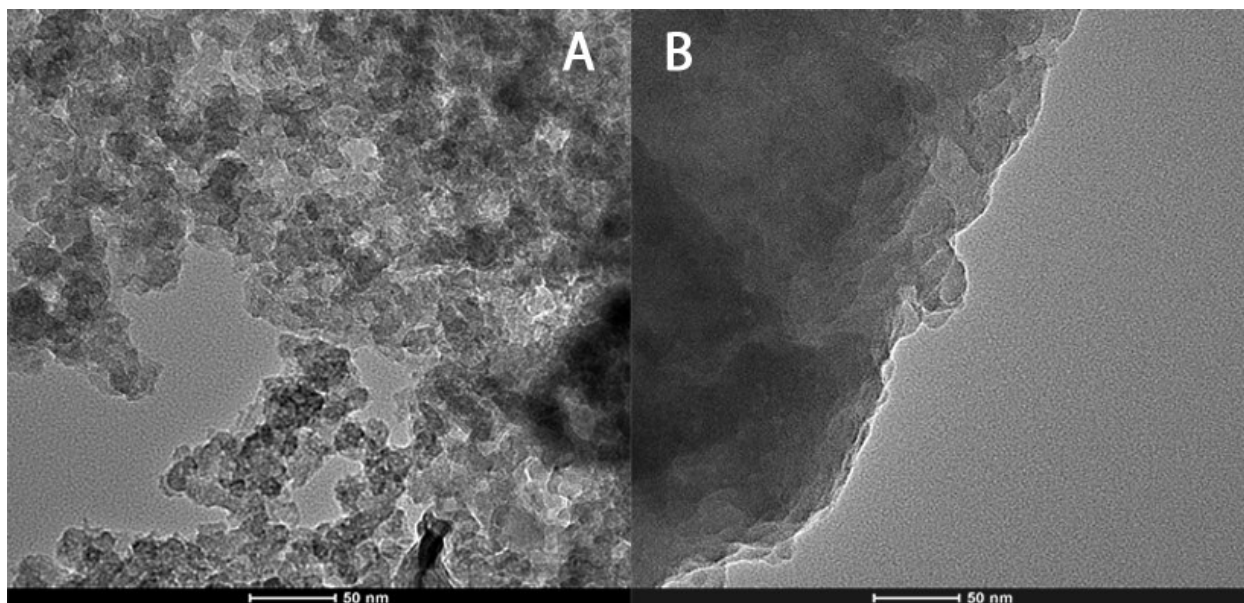

**Figure S5.** TEM images of samples with the APTES/MTMSPA molar ratio of 0.5 (A) and 0.75 (B)

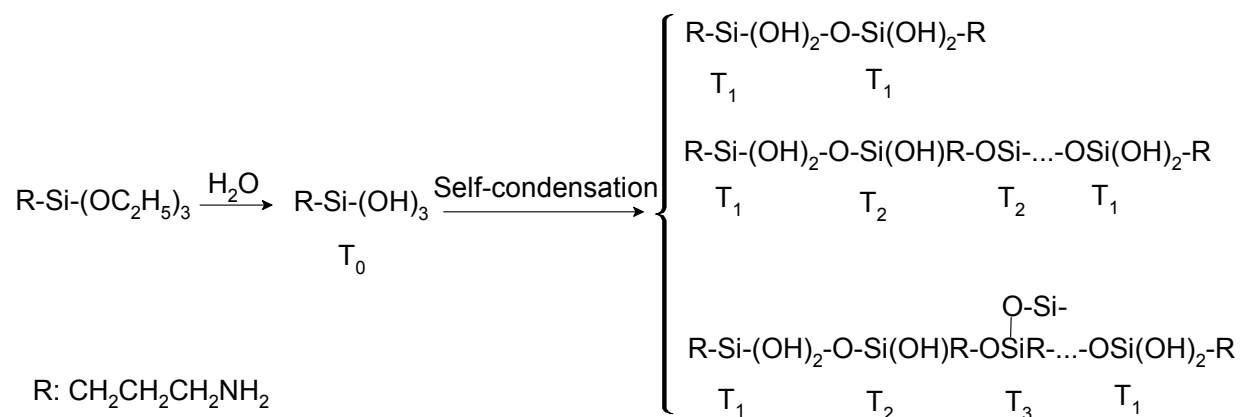

**Figure S6.** APTES self-condensation illustration.  $T_0$  is the APTES hydrolyzed monomer with 3 unbonded OH groups,  $T_1$  is single-side bonded APTES with 2 unbonded OH groups,  $T_2$  is double-side bonded APTES with only one unbonded OH group and  $T_3$  3-side bonded APTES with no unbonded OH group.

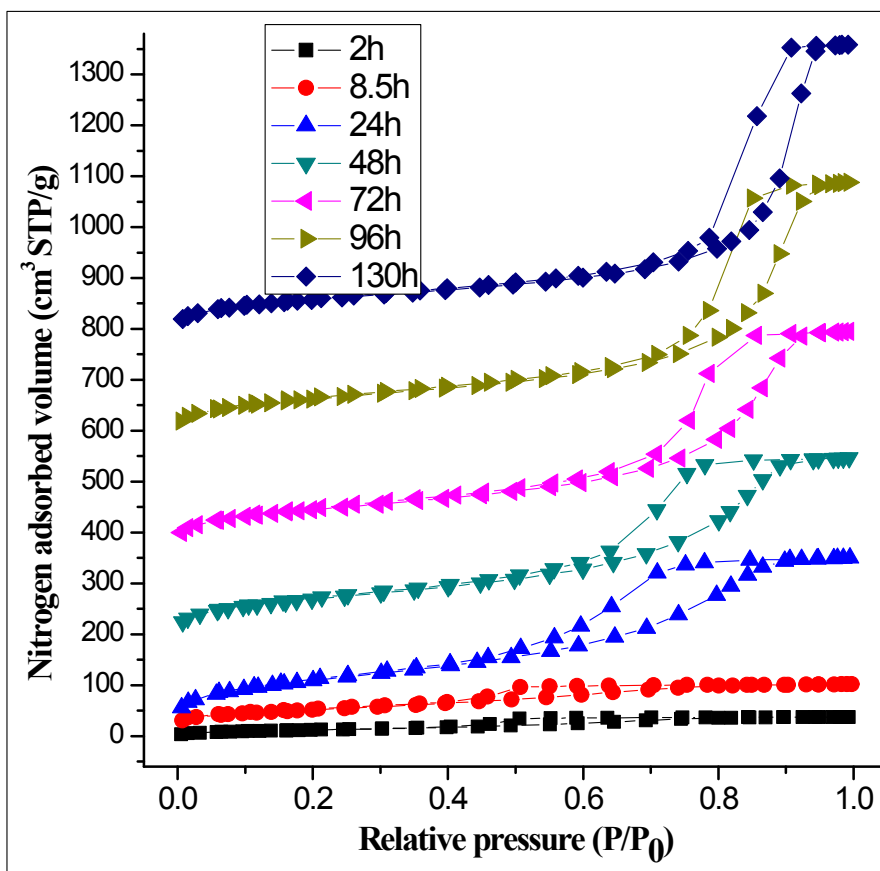

**Figure S7.** Nitrogen adsorption isotherms of APTES-ABS samples aged in water. Shift value for Y axis: 2h + 0, 8.5h +20, 24h + 30, 48h + 200, 72h + 380, 96h + 600, and 130h + 800.

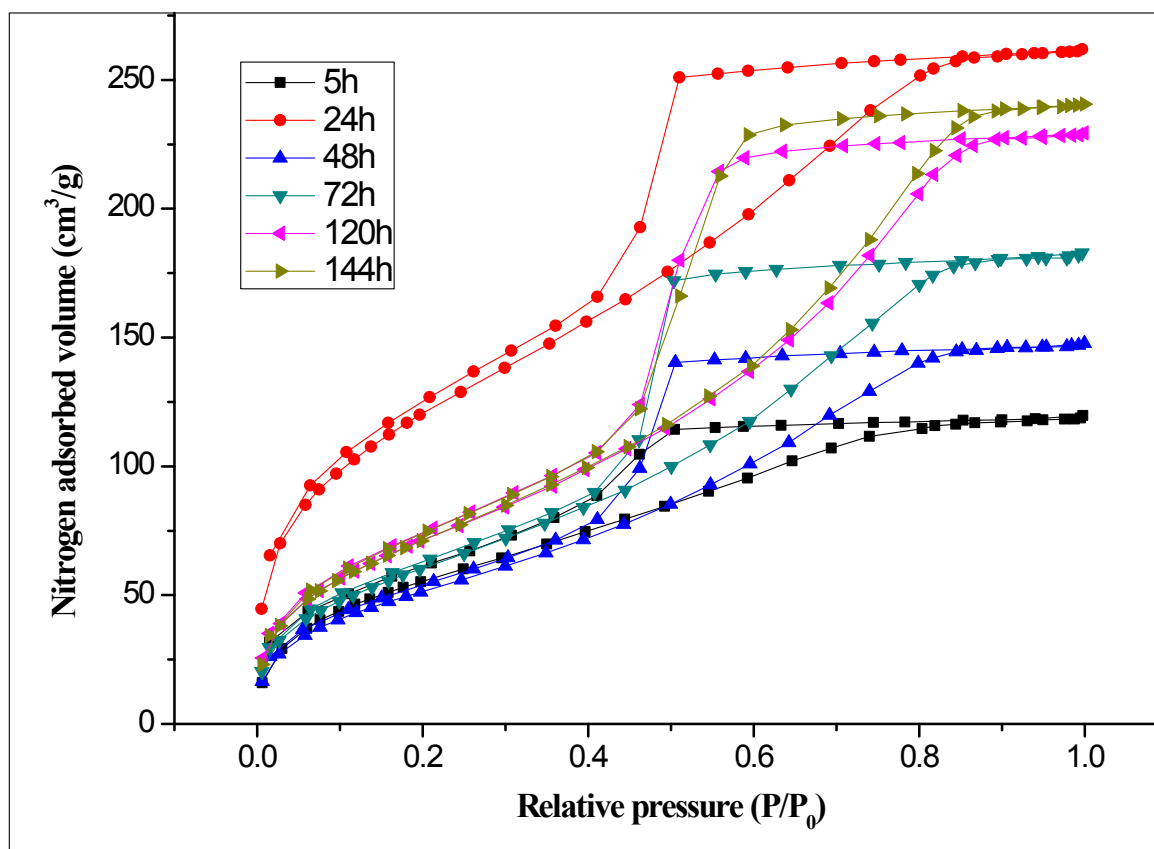

Figure S8. Nitrogen adsorption isotherms of APTES-ABS samples aged in ethanol

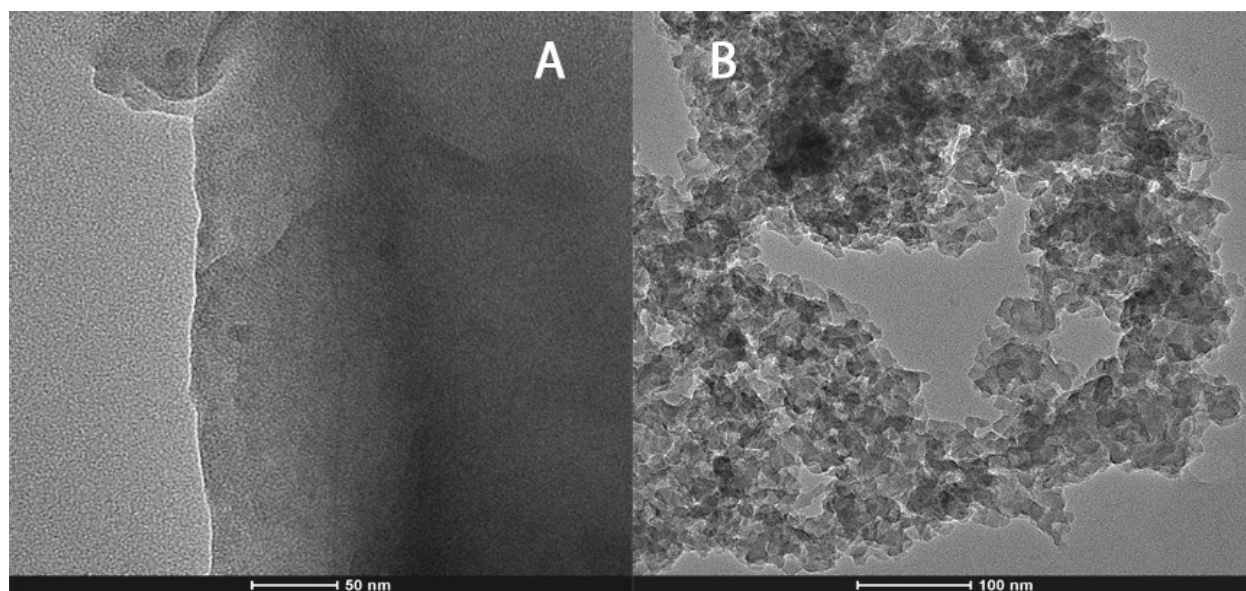

Figure S9. TEM images of samples aged in water for 2h (A) and 130h (B)

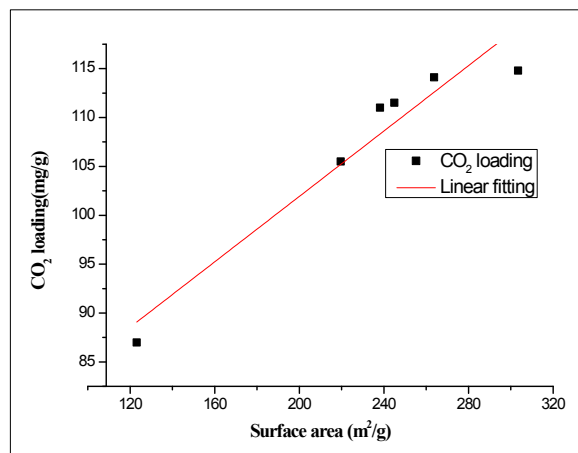

**Figure S10.** Relation between surface area and CO<sub>2</sub> loading of APTES-ABS aged in water

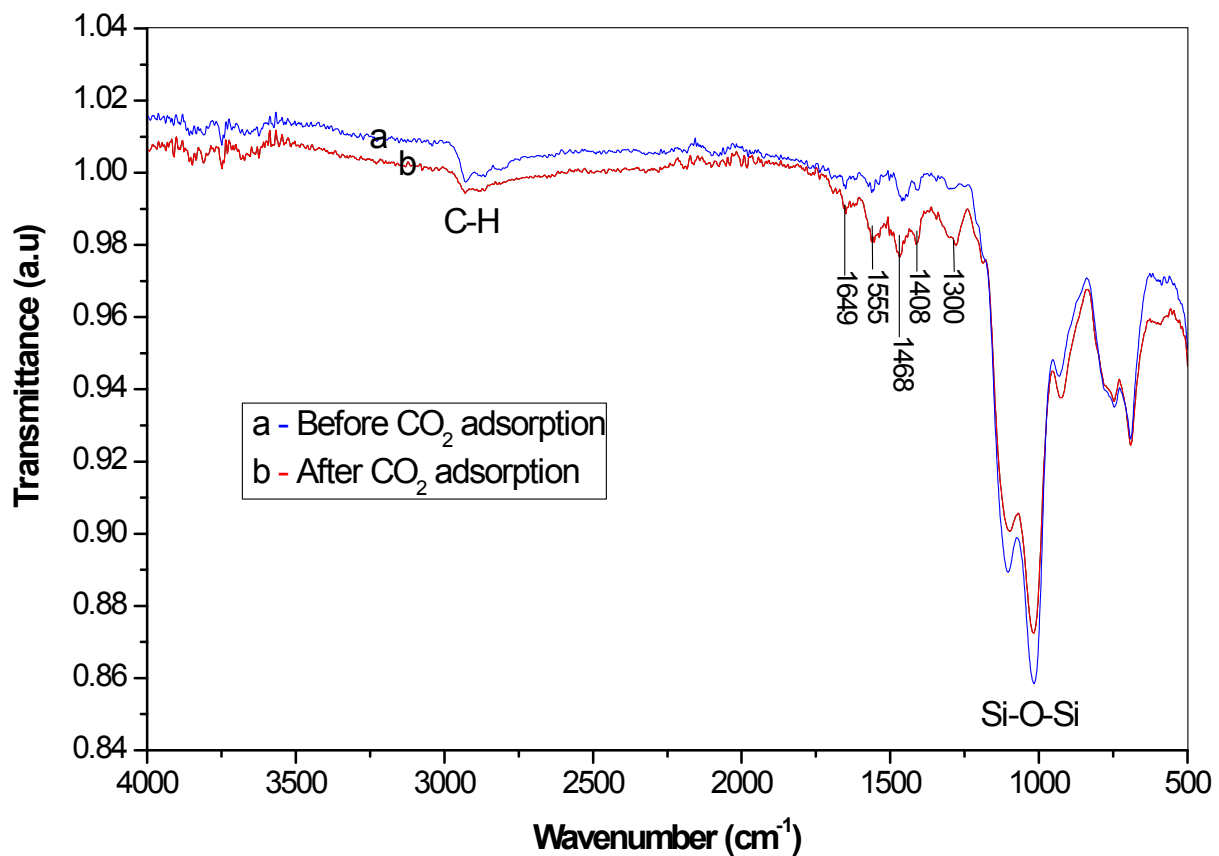

**Figure S11.** FTIR spectra of APTES-ABS aged for 120h in ethanol before (a) and after (b) CO<sub>2</sub> adsorption. Sample was activated at 125 °C in nitrogen flow for 4h and then used for FTIR analysis and CO<sub>2</sub> adsorption.

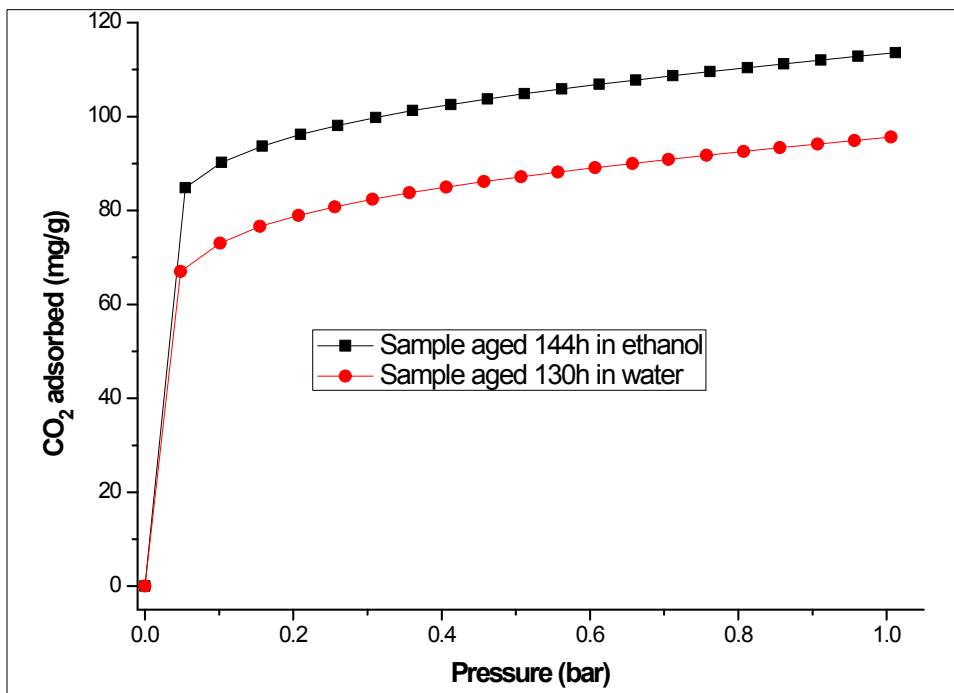

Figure S12. CO<sub>2</sub> adsorption isotherms of samples aged 130h in water (after 14 months) and 144h in ethanol (after 12 months).



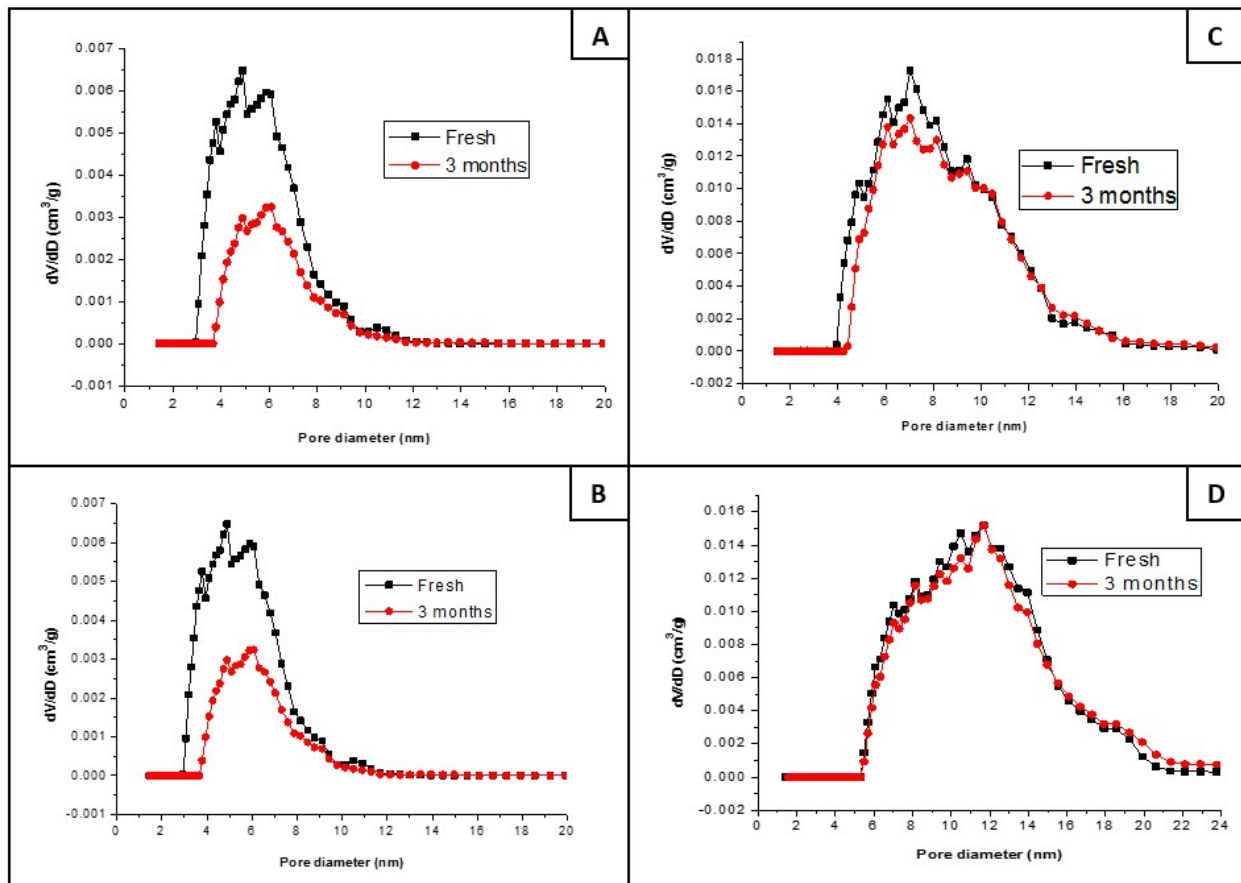

**Figure S13.** Pore size distribution of fresh APTES-ABS samples and after 3 month storage. Samples were aged in water for 8.5 h (A), 24h (B), 48 h (C) and 72 h (D).

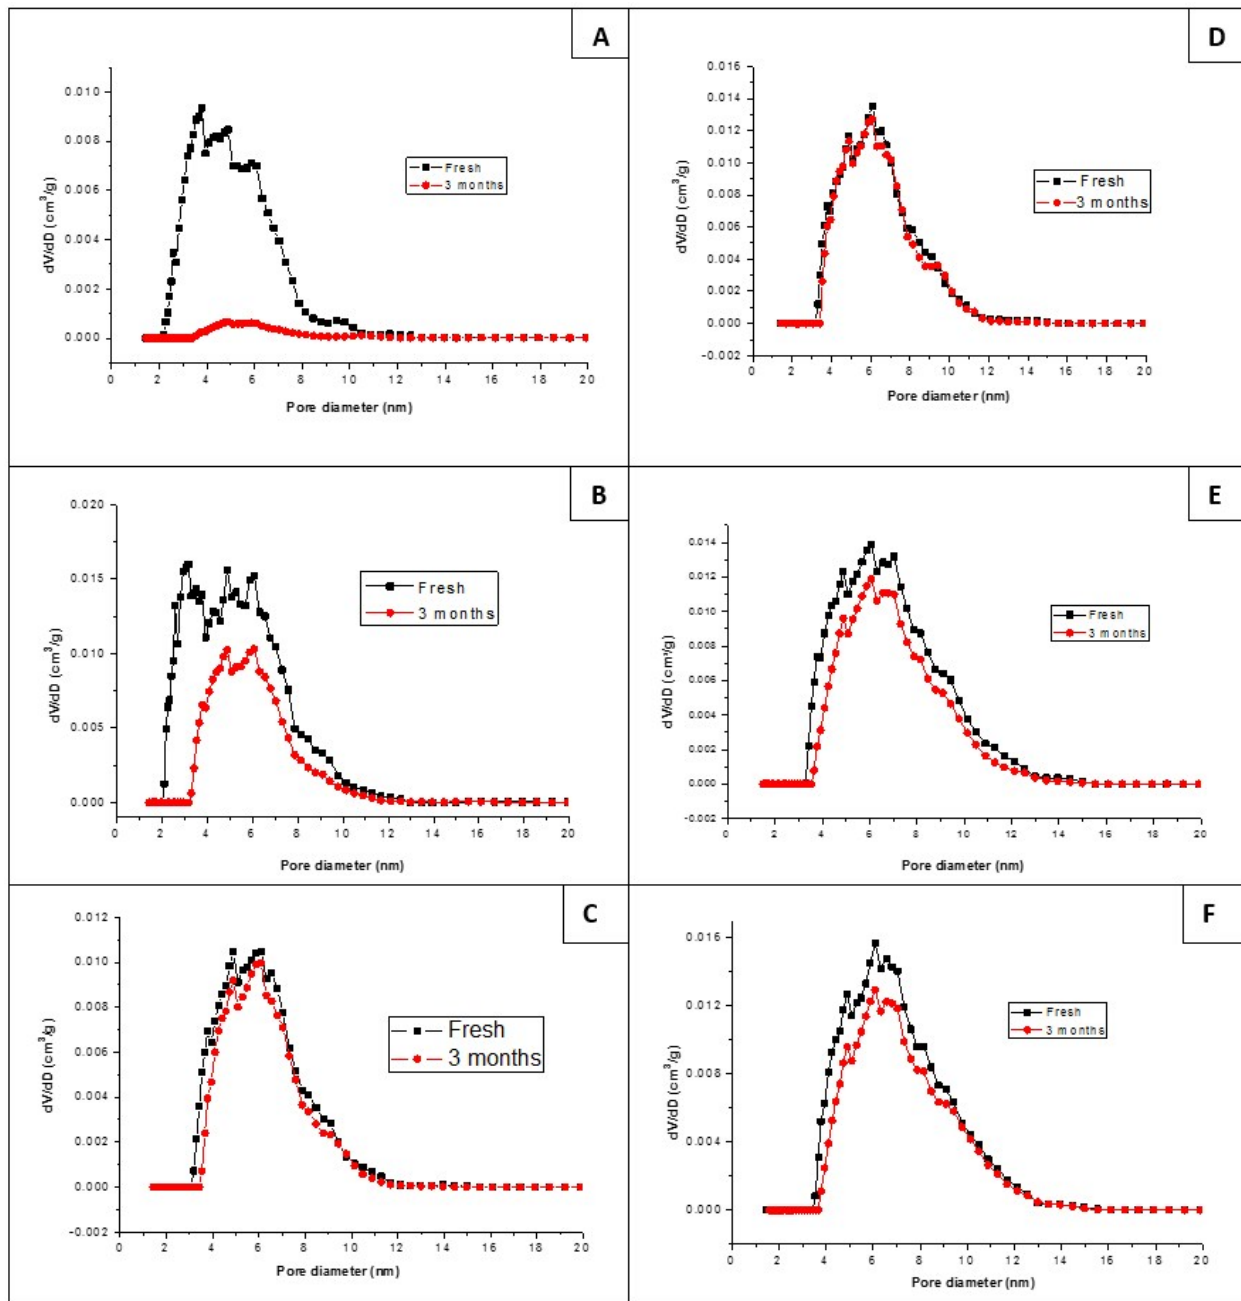

**Figure S14.** Pore size distribution of fresh APTES-ABS samples and after 3 month storage. Samples were aged in water for 5 h (A), 24h (B), 48 h (C), 72 h (D), 120 h (E), and 144h (F).
